# Supplementary material
Source: Springer Nature journal article supplement (https://www.springermedizin.de/resource/supplementary/12905_2009_165_MOESM1_ESM.pdf/9519220)
Supplement: MOESM1 [file 9519220]

Women with predominant moderate to severe stress urinary incontinence whom seek treatment

Diagnostic work-up  
Fulfill all in- and exclusion criteria  
Randomisation, stratified by severity  
Blocks of 4  
N = 400

Pelvic Floor  
Muscle Training  
N = 200

TVT(O)  
Surgery  
N = 200

At 0, 2 and 4 months training  
interval  
Compliance and additional  
cost measurements

At 0, 2 and 4 months interval  
Additional cost measurements

Follow up after  
complete treatment at  
6,12 and 18 months

Follow up after complete  
treatment at  
6,12 and 18 months
